# Supplementary material
Source: PubMed Central journal article supplement (PMC3775980)

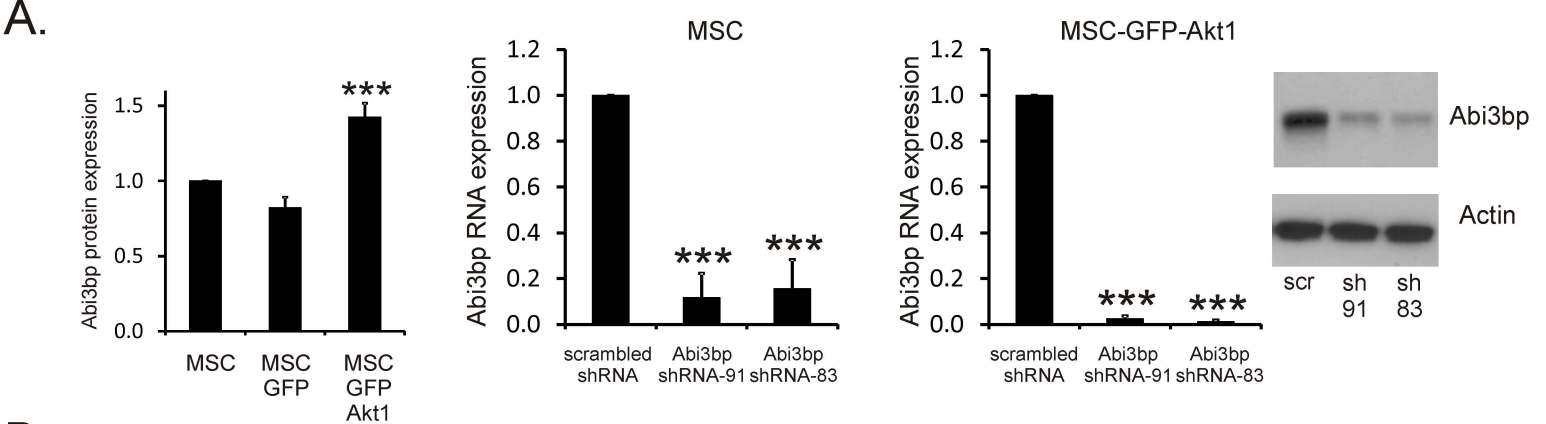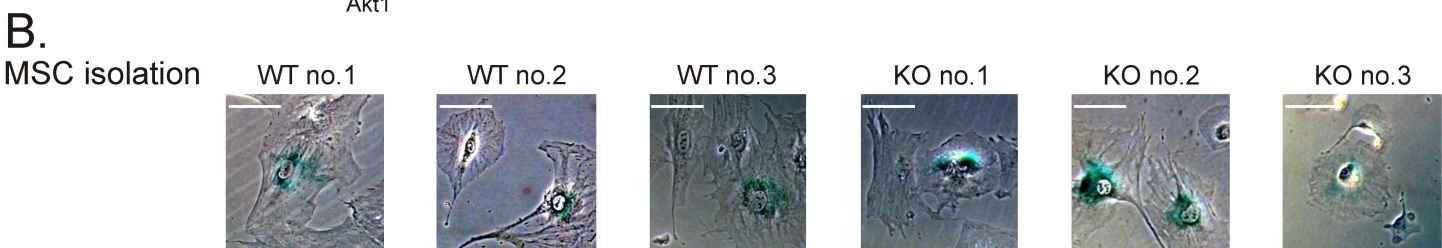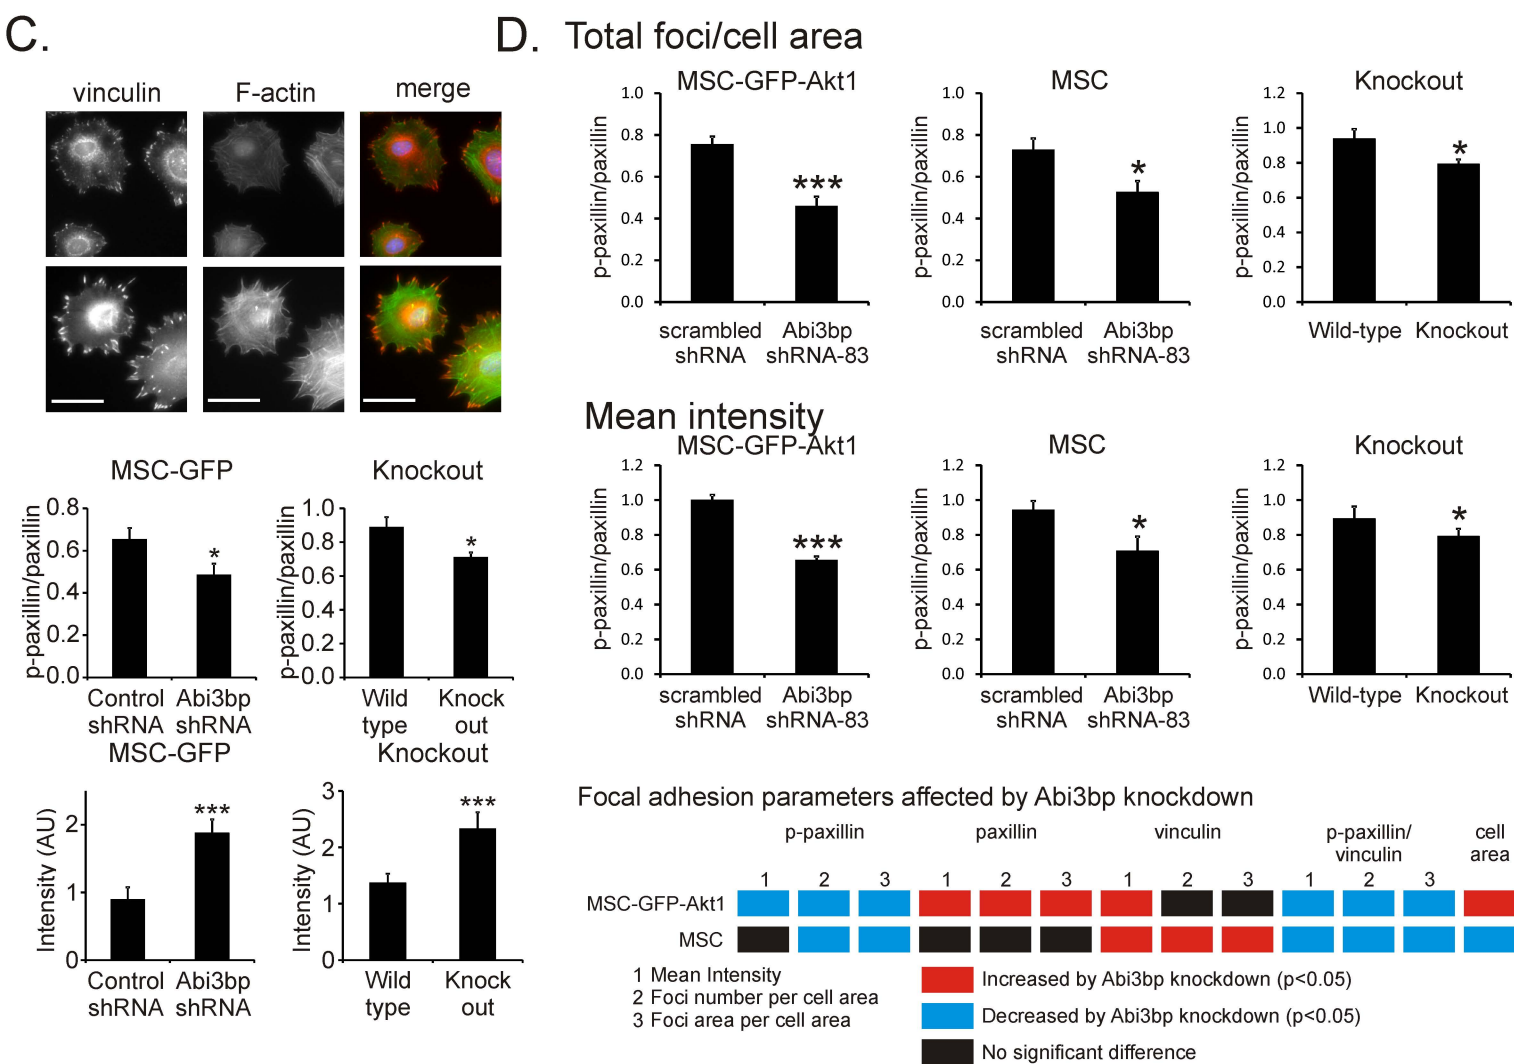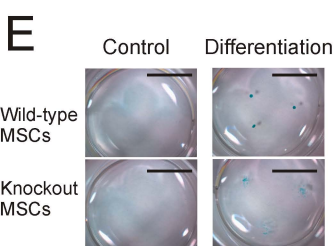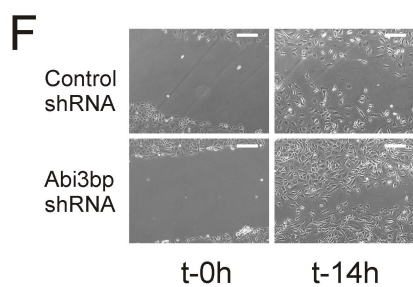

CD29 CD44 Sca-1 CD51 ckit CD11b CD45 CD31 CD34

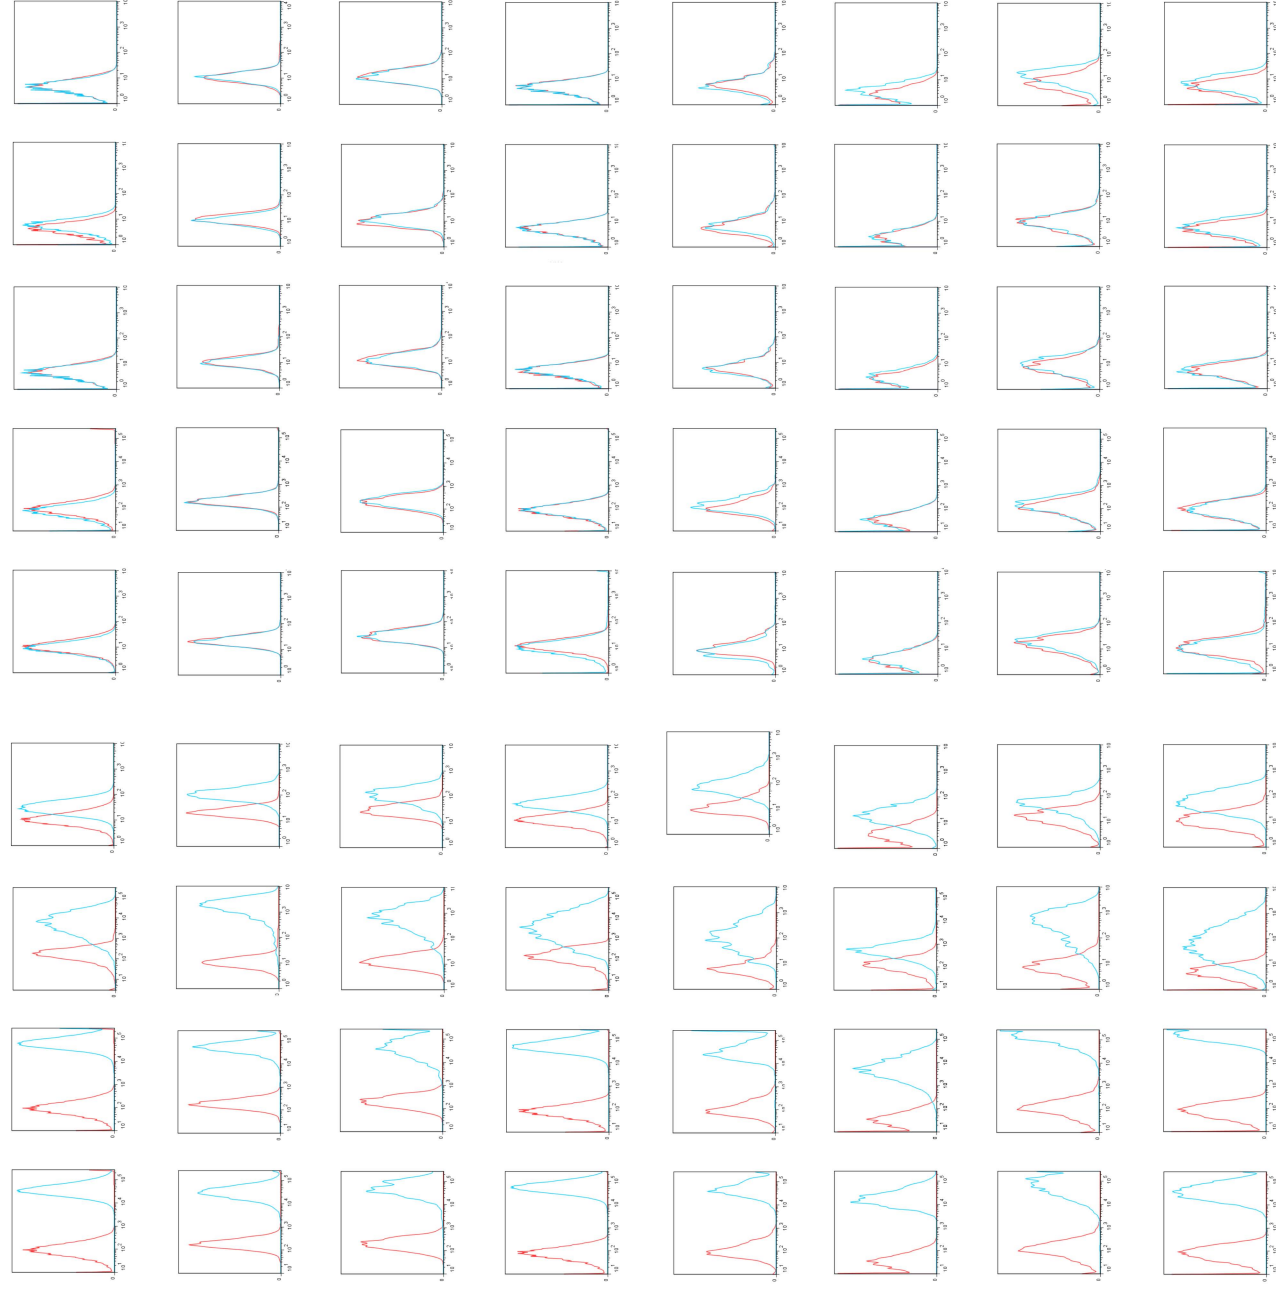

WT isolate 1

WT isolate 2

WT isolate 3

KO isolate 1

KO isolate 2

KO isolate 3

Lung

Liver

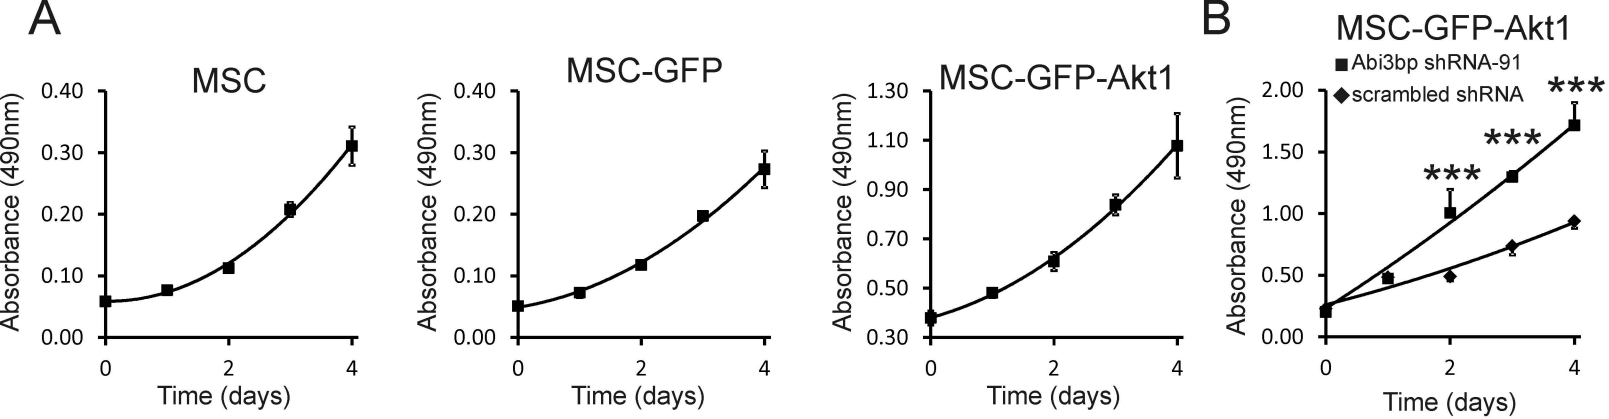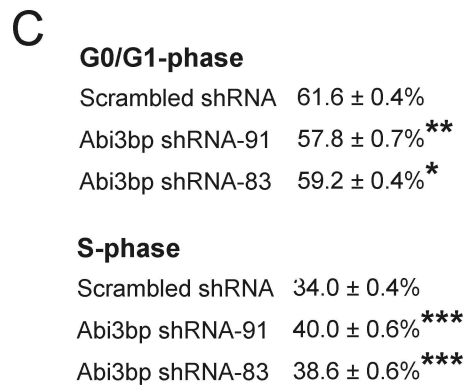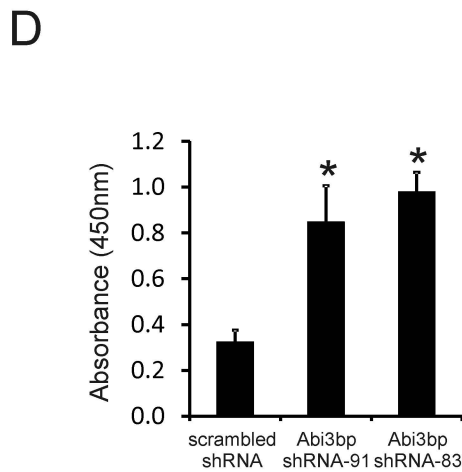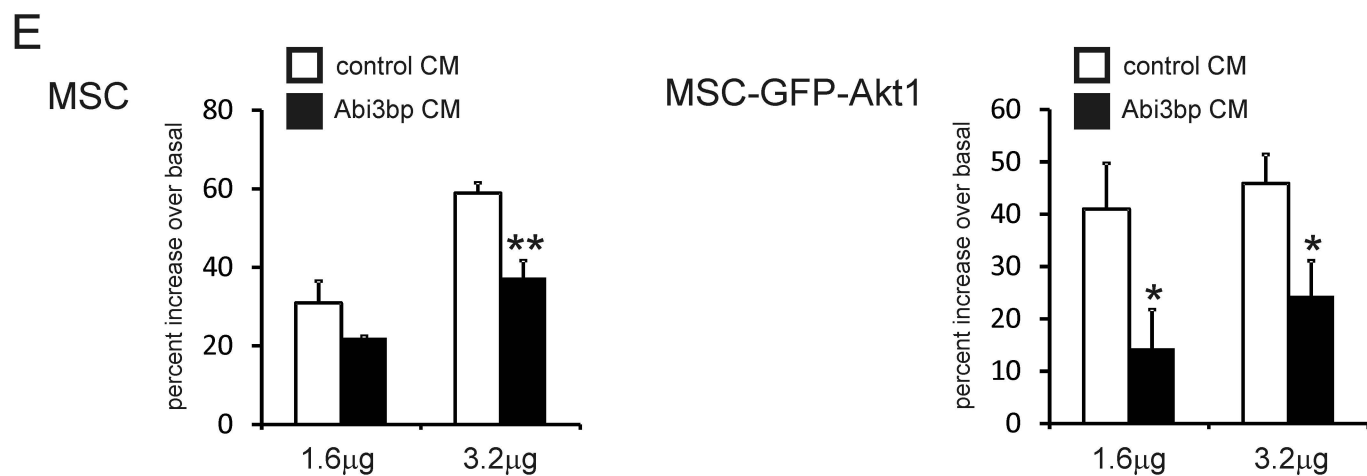

A

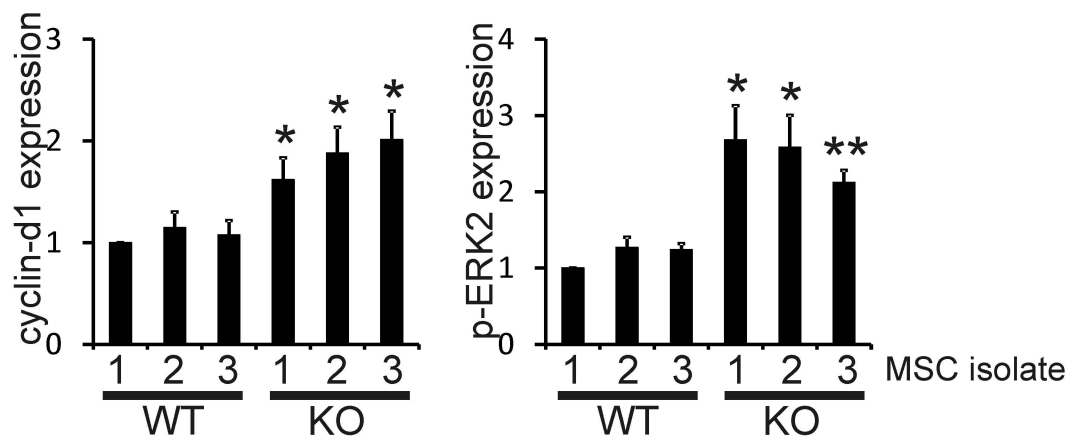

B

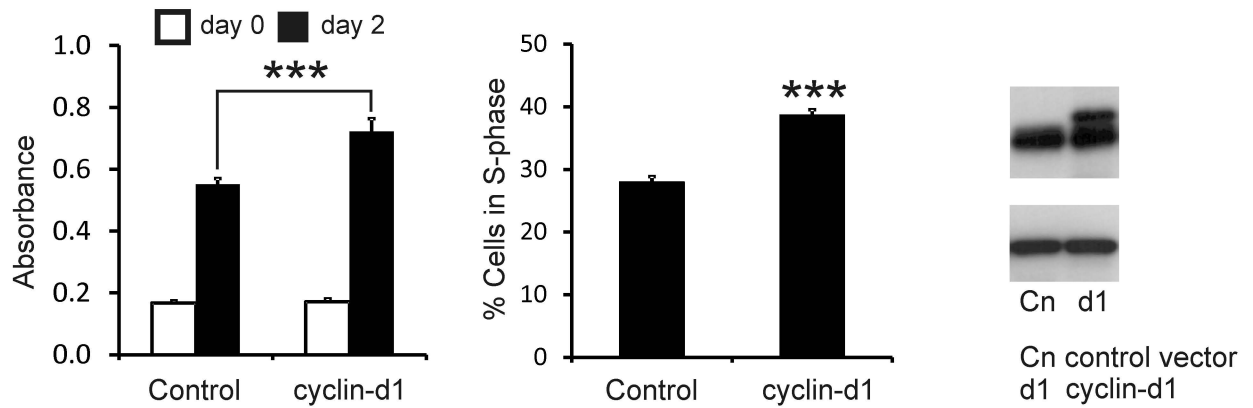

C

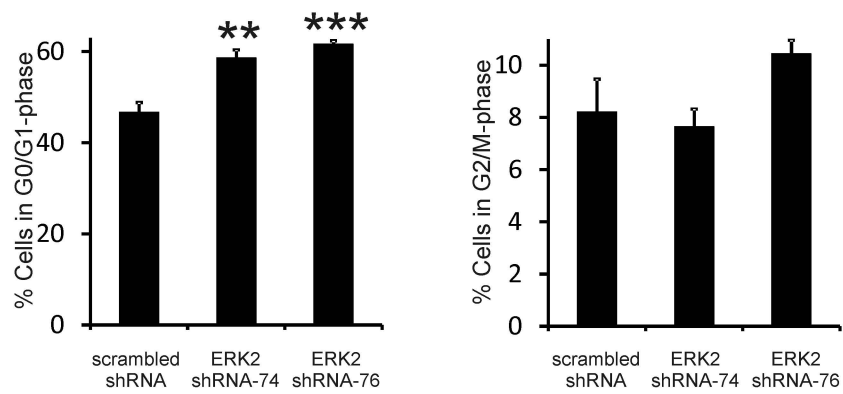

A

## U0126

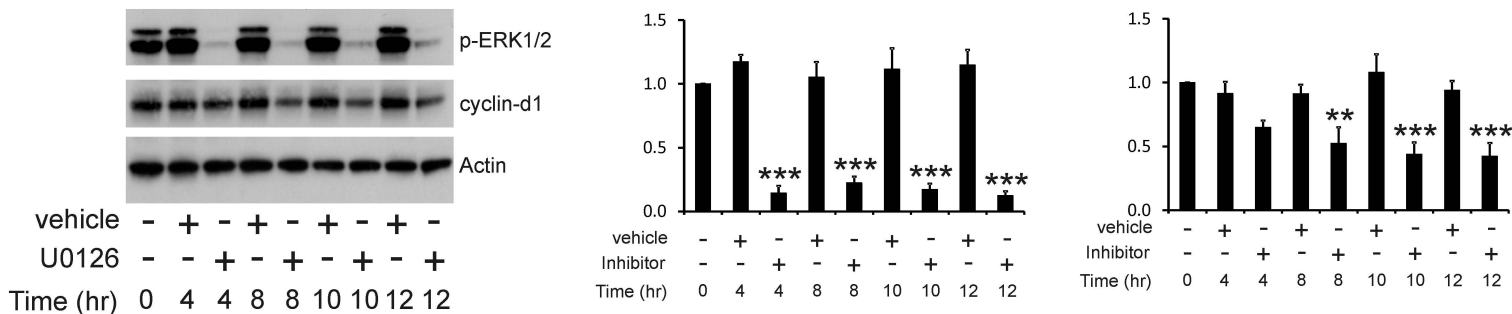

## PD98059

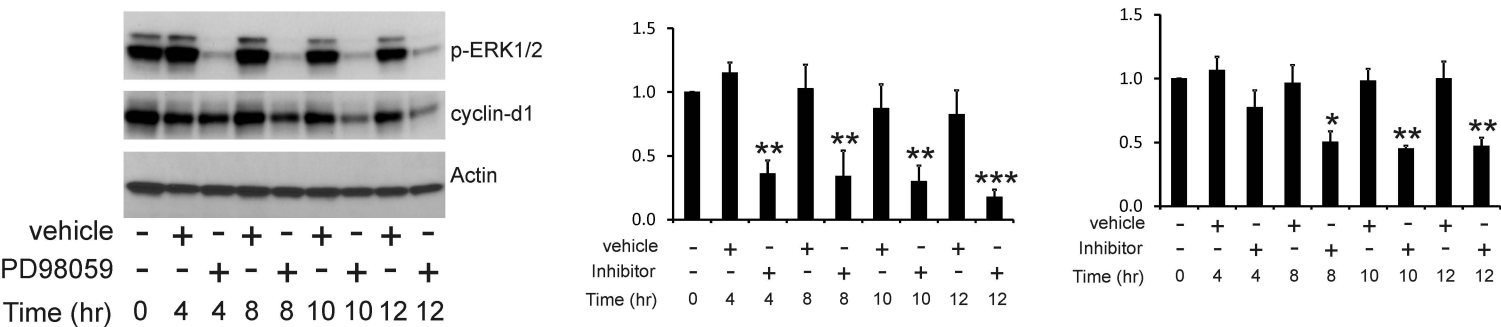

B

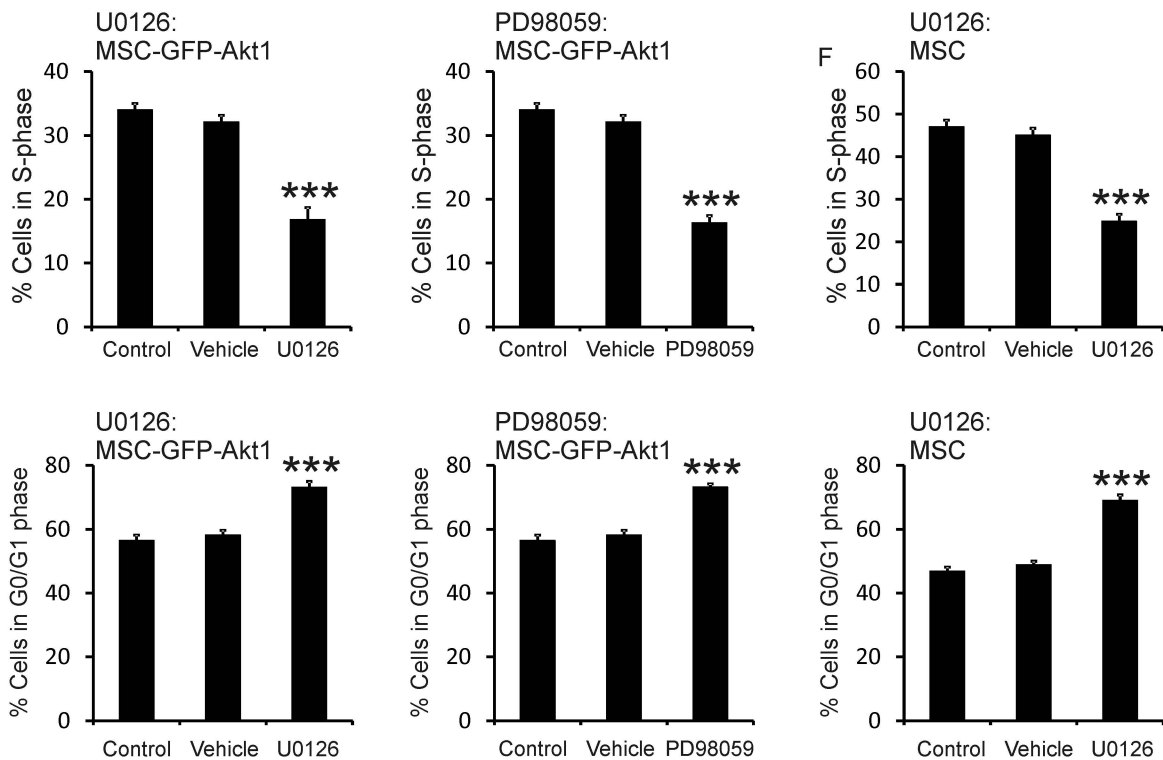

C

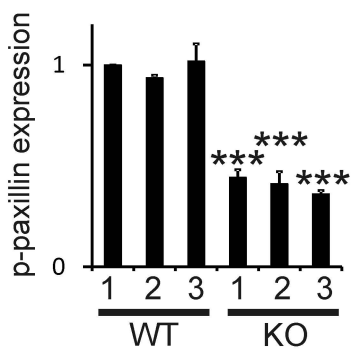

A

paxillin antibody

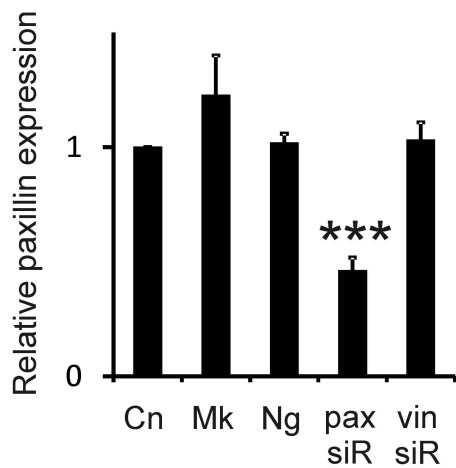

vinculin antibody

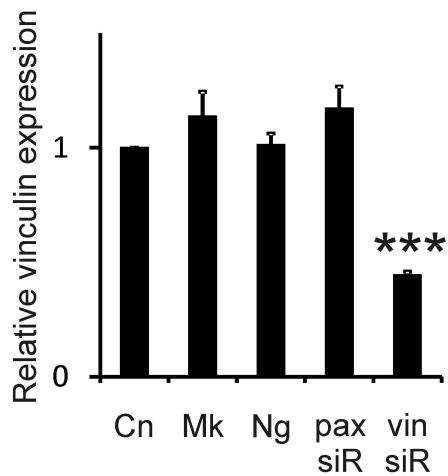

Cn: control, Mk: Mock, Ng: control siRNA, pax siR: paxillin siRNA, vin siR: vinculin siRNA

B

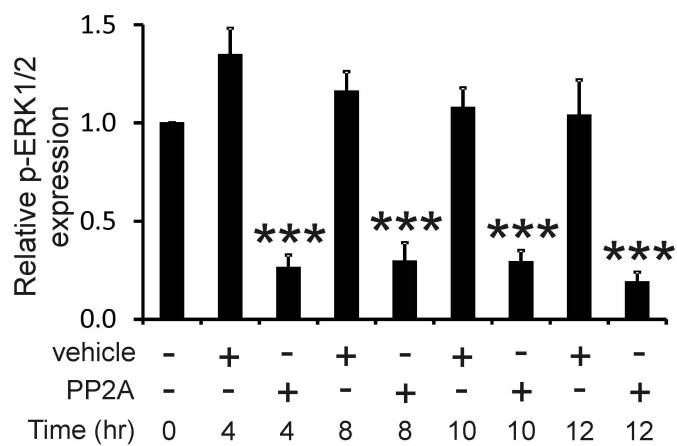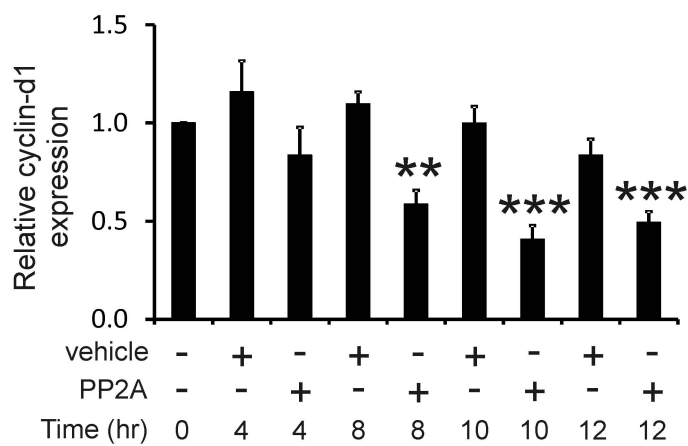

A

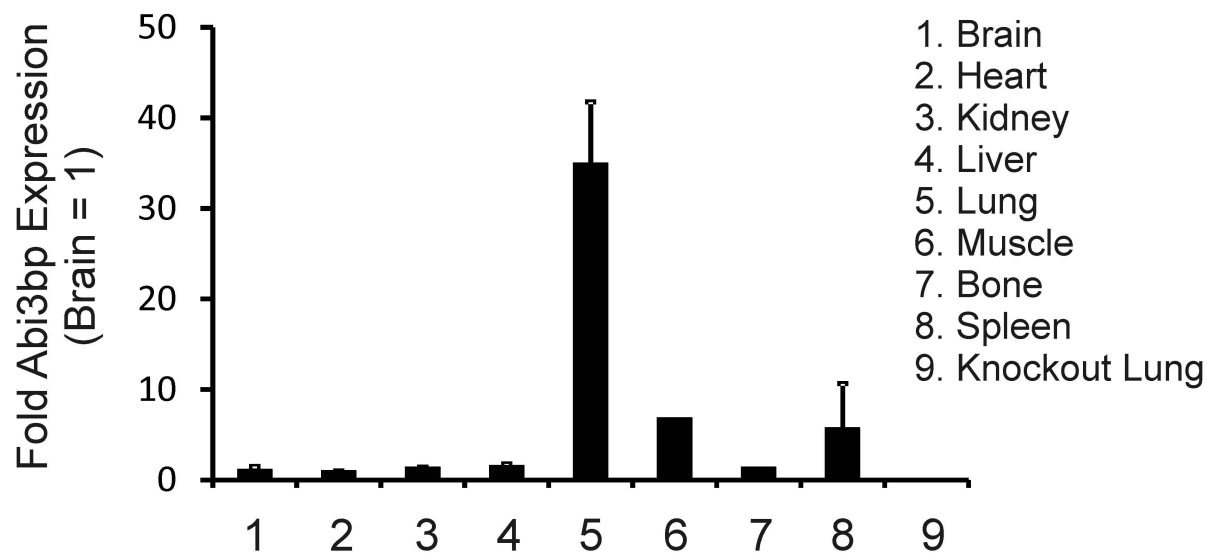

B

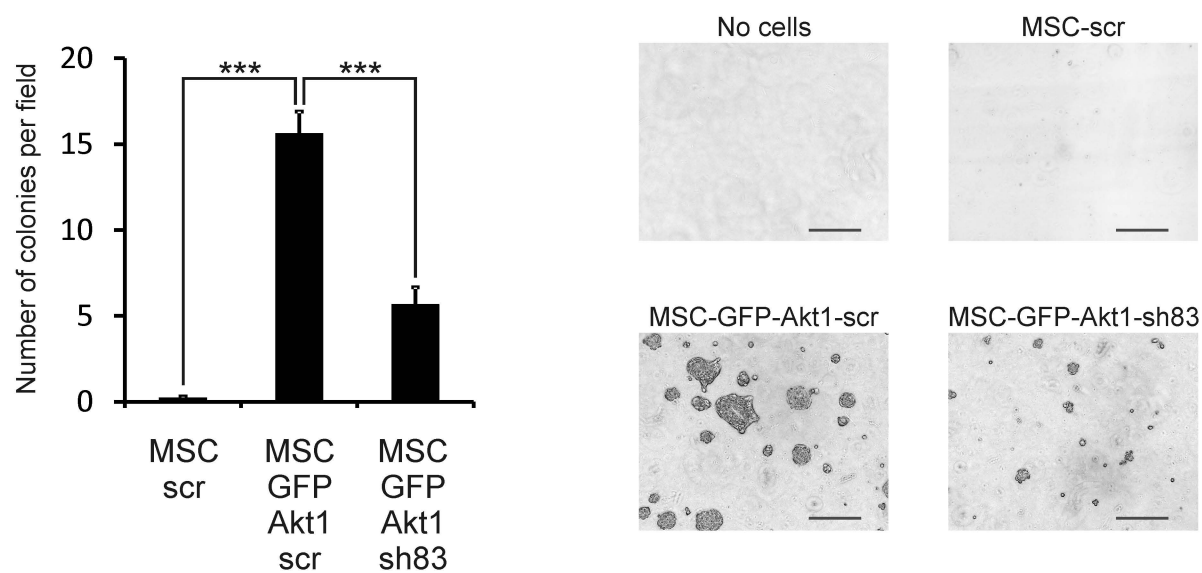

A.  $CD45^{neg}[CD44-CD105]^{pos}$  in bone marrow

Wild-type bone marrow

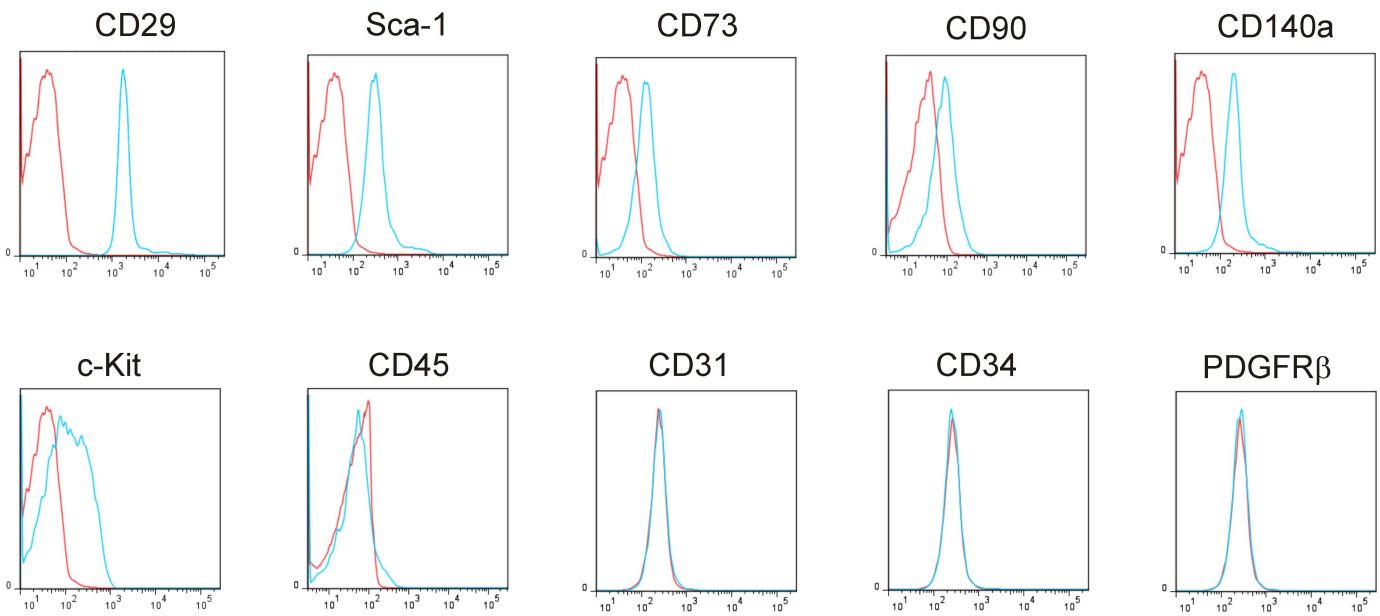

Knockout bone marrow

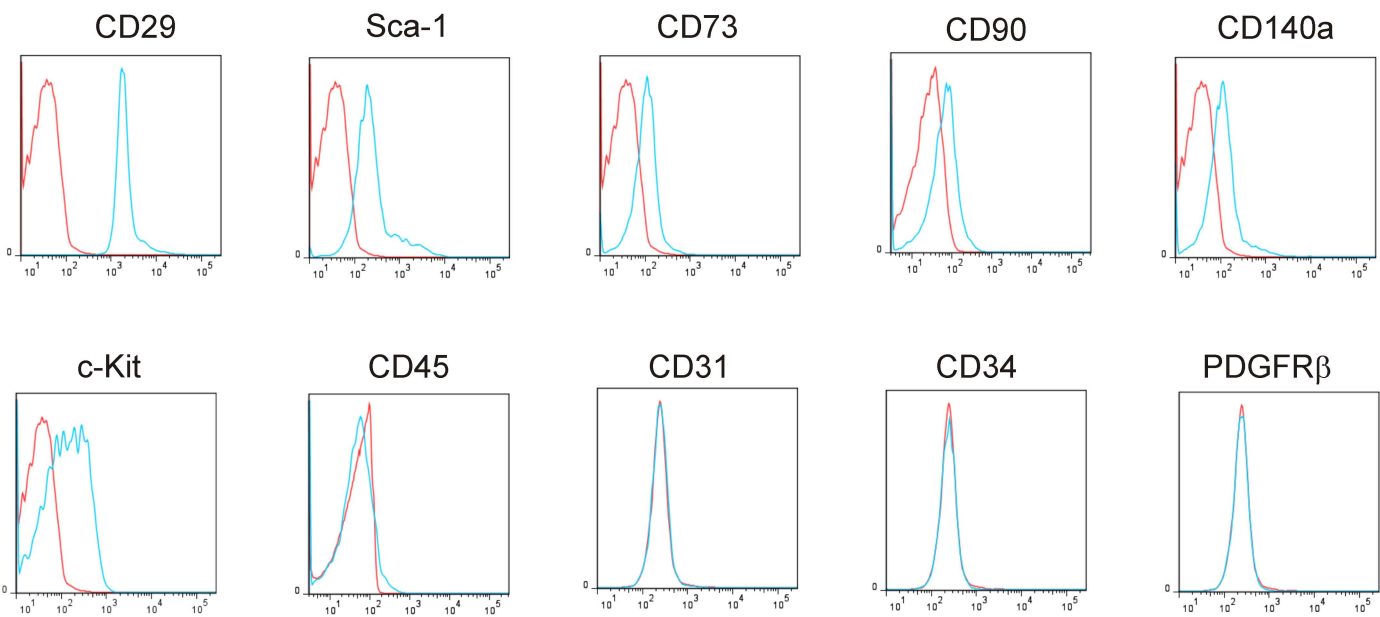

B.  $CD45^{neg}CD44^{pos}$  cells are enriched in the tissue culture plastic attached population

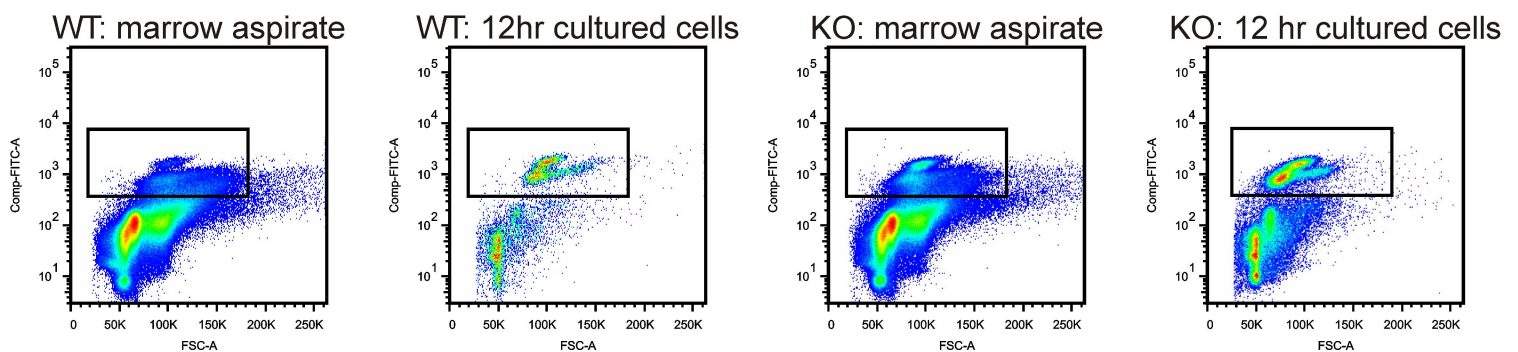



# A. Lung and liver MSC differentiation

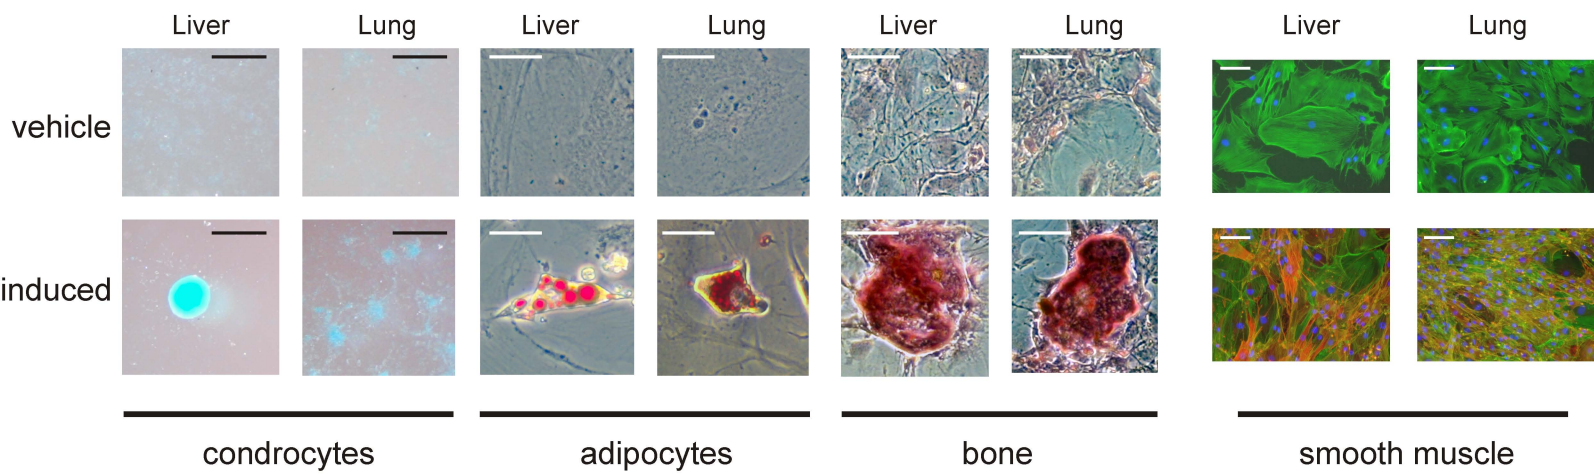

# B.

## Kidney

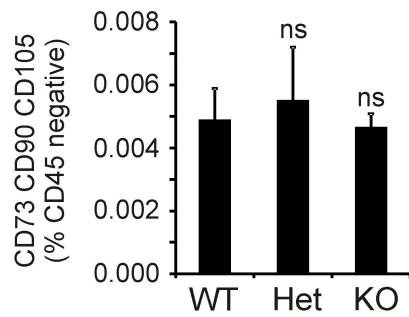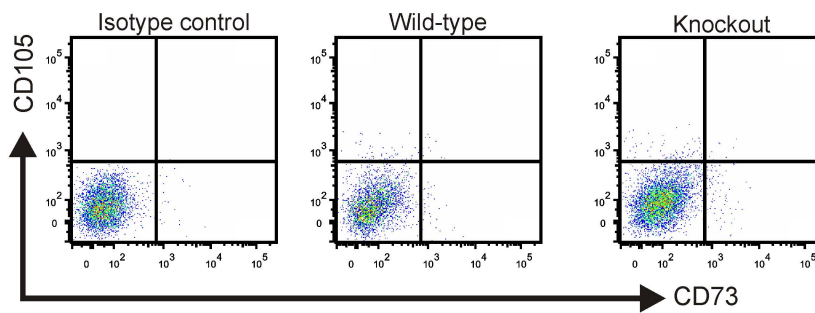

## Lung

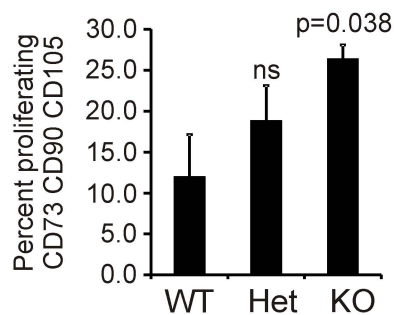

A. Abi3bp controls proliferation, differentiation, and cell behaviour of MSCs

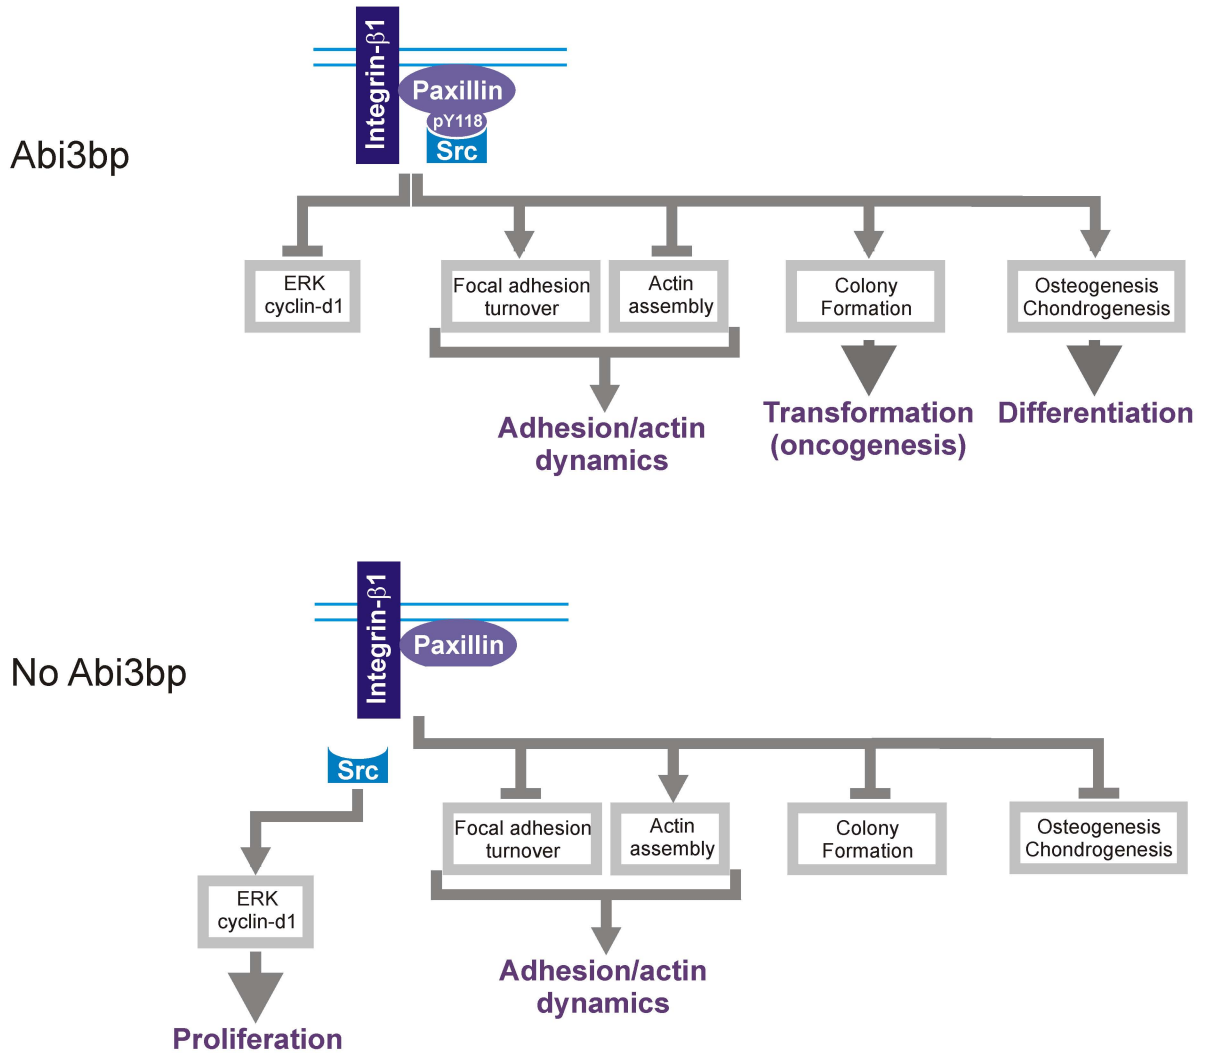

B. Cell signalling pathway to proliferation

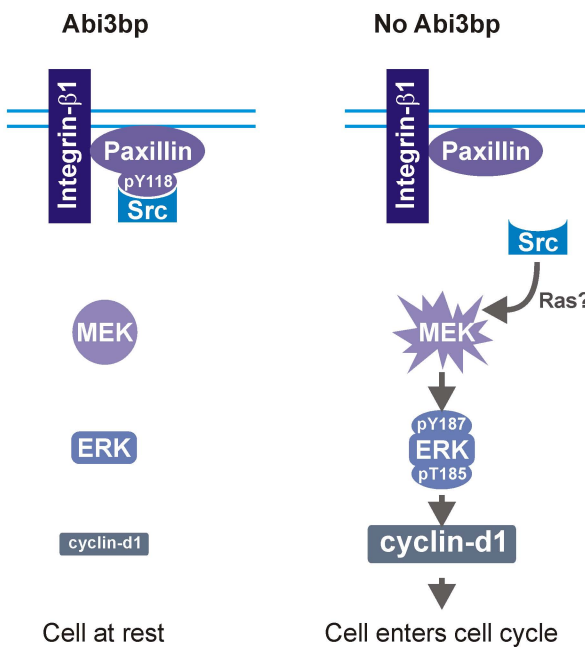

Supplement: NIHMS479771-supplement-Supp_Fig_S1-10.pdf [file NIHMS479771-supplement-Supp_Fig_S1-10.pdf]
